# Supplementary material for: Antifouling properties of two-dimensional molybdenum disulfide and graphene oxide
Source: Royal Society of Chemistry journal article supplement (doi:10.1039/c8en00202a), 2018-01-01
Supplement: c8en00202a1.pdf [file c8en00202a1.pdf]

## Supporting Information

### Antifouling Properties of Two Dimensional Molybdenum Disulfide and Graphene Oxide

Iftaykhairul Alam <sup>1</sup>, Linda M. Guiney<sup>2</sup>, Mark C. Hersam<sup>2</sup>, and Indranil Chowdhury <sup>1\*</sup>

<sup>1</sup> Department of Civil & Environmental Engineering, Washington State University, Pullman,  
WA 99164, USA

<sup>2</sup> Departments of Materials Science and Engineering, Chemistry, and Medicine, Northwestern  
University, Evanston, Illinois 60208, USA

**Number of Figures. 11**

**Number of Table. 1**

\*Contacting author: [indranil.chowdhury@wsu.edu](mailto:indranil.chowdhury@wsu.edu); 509-335-3721

## 1. Introduction

In this section, additional details on graphene oxide (GO) synthesis and DLVO theory are provided. Raw data from QCM-D are presented in the supporting information. Moreover, interaction energy profile between *E. coli* and GO/MoS<sub>2</sub> calculated from DLVO theory and mechanistic figure of NOM and *E. coli* interactions with the GO are also provided in the supporting information.

## 2. Synthesis of GO

As discussed, modified Hummer's was used to prepare GO.<sup>1,2</sup> 115 ml concentrated sulfuric acid was placed in 2L beaker and cooled to 0°C using an ice water bath. 5 g of natural graphite flakes (3061 grade material from Asbury Graphite Mills) were added to acid followed by slow addition of 15g KMnO<sub>4</sub> with continuous stirring and cooling so that temperature does not go above 20°C. Heating the mixture to 35°C, 230 mL of deionized (DI) water was added and the reaction was ended after the addition of 700 mL of DI water. Finally, 12.5 mL of 30% H<sub>2</sub>O<sub>2</sub> solution was slowly added to the mixture. The mixture was treated subsequently by vacuum filtration and 1:10 HCL solution to remove as much as liquid and metal contaminants respectively. After resuspension of the filtrate in 500 mL DI water, it was centrifuged for 12 h at 7500 rpm to sediment the GO, and the supernatant was decanted. After repeating the DI wash 6 times, the final solution resulted in mixture with pH of around 6. The mixture was further sonicated in stainless steel beakers via a Fisher Scientific Model 500 Sonic Dismembrator with a 1/2" tip for 1 hour at 50% amplitude (~55 W) while cooled in an ice water bath. Finally, any unoxidized graphite was removed by

centrifugation at 5000 rpm for 10 min. By slow evaporation of the liquid from a portion of the final solution, the optical absorbance at 300 nm was determined to be 3680 mL mg<sup>-1</sup> m<sup>-1</sup>.

### 3. Derjaguin–Landau–Verwey–Overbeek (DLVO) theory

Previous studies have shown that the deposition and aggregation kinetics of NOM and other foulants present in 1-1 electrolyte solution (i.e. NaCl) on nanomaterials can be explained by colloidal theory including DLVO theory.<sup>3,4</sup> The DLVO theory explains the aggregation of aqueous dispersions quantitatively and describes the force between charged surfaces interacting through a liquid medium. It combines the effects of the van der Waals attraction and the electrostatic repulsion<sup>4</sup> The attraction (van der Waals) energy between a sphere and a flat plate at a separation distance of h, is defined as<sup>4</sup>:

$$V_{VDW} \text{ in } J = -\frac{Aa}{6h} \left[ \frac{1}{1 + \frac{14h}{\lambda}} \right] \quad (4)$$

Where,

A = Hamaker Constant (J) where A= 5.80\*10<sup>-21</sup> J

a = colloid particle radius (m)

λ = dielectric wavelength (m)

The interaction energy between a sphere, with diameter 2a and an infinite plate, and zeta potentials of Ψ<sub>1</sub> and Ψ<sub>2</sub> respectively, separated by a distance h, by the Deryagin method is as follows<sup>5</sup>:

$$V_{EDL} \text{ in } J = \pi a \epsilon_o \epsilon_r \left\{ 2\Psi_1 \Psi_2 \ln \left( \frac{1 + e^{-\kappa h}}{1 - e^{-\kappa h}} \right) + (\Psi_1^2 + \Psi_2^2) \ln(1 - e^{-2\kappa h}) \right\} \quad (5)$$

Where,

κ = debye length (m<sup>-1</sup>)

$\epsilon_0$  = permittivity of free space (C/Vm)

$\epsilon_r$  = relative permittivity

$\Psi_1$  = collector (plate) surface potential (V)

$\Psi_2$  = colloid (sphere) surface potential (V)

In this study, GO and MoS<sub>2</sub> coated gold sensors acted as plates while the *E. coli* cells were considered to be spheres. DLVO theory will help to understand the interaction of foulants with the material surfaces.

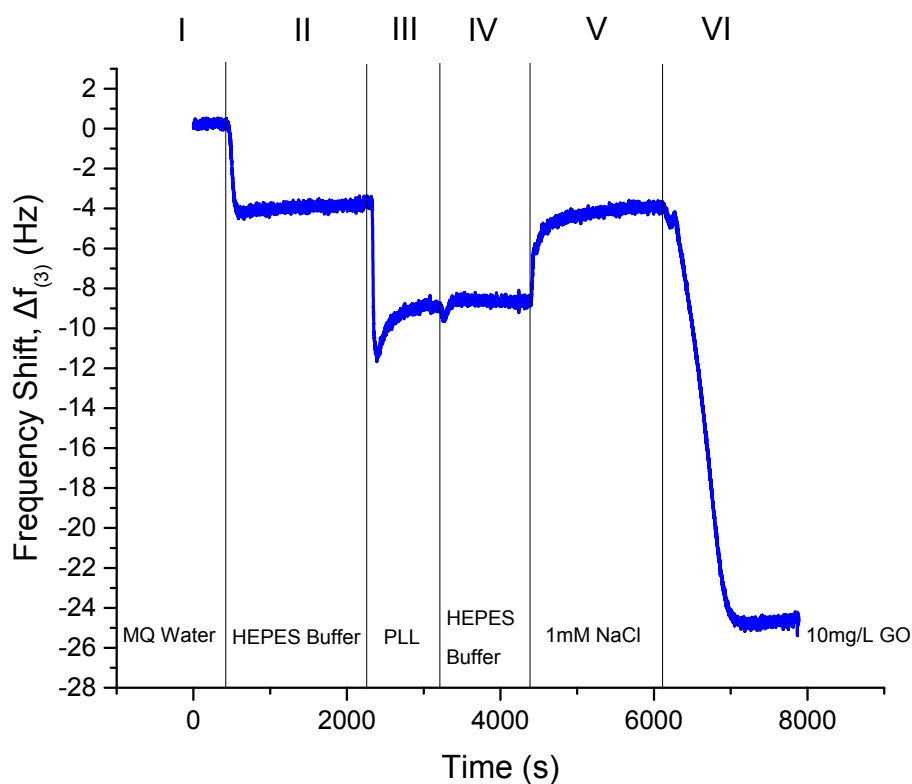

**Figure S1.** The gold sensor was rinsed with MQ water for at least 60 min (data not shown in the figure) to achieve a stable baseline before starting any fouling experiment (Stage I). Frequency shifts at the third overtone during deposition of negatively charged GO on a negatively charged gold surface using QCM-D with the help of a positively charged PLL polymer layer working as a linker between the gold surface and GO. A decrease in the frequency shift (stage II, III, VI) suggests the deposition of mass onto the gold surface and an increase (stage III, V) indicates release of mass.

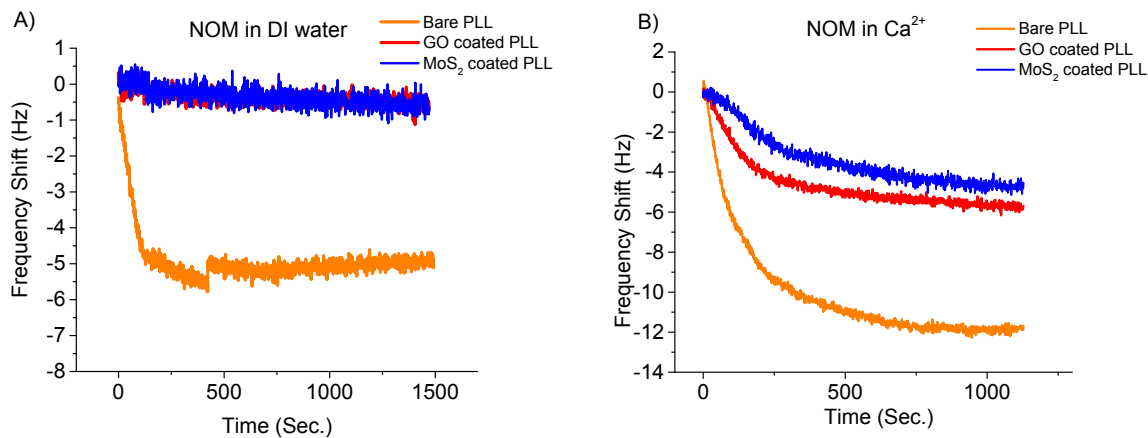

**Figure S2.** Interaction of PLL, GO and MoS<sub>2</sub> surfaces with NOM without any salts (Fig. A, left) and NOM in Ca<sup>2+</sup> (Fig. B, right). PLL surface being positively charged showed higher fouling against negatively charged foulants. Moreover, lower frequency shifts and attachment efficiencies for GO and MoS<sub>2</sub> indicated there was no PLL exposed after GO/MoS<sub>2</sub> deposition. Any exposed PLL even after GO/MoS<sub>2</sub> coating would result into higher frequency shifts and dissipation changes like bare PLL surface experiment.

**Table S1. QCM-D results**

| <b>Fouling condition</b>                | <b>Material surface</b> | <b>Maximum frequency shifts (Replicates)</b> | <b>Attachment efficiency (Replicates)</b> |
|-----------------------------------------|-------------------------|----------------------------------------------|-------------------------------------------|
| <b>NOM without any salt</b>             | <b>GO</b>               | <b>-0.96 Hz</b>                              | <b>0.35</b>                               |
|                                         |                         | <b>-1.33 Hz</b>                              | <b>0.21</b>                               |
|                                         |                         | <b>-0.97 Hz</b>                              | <b>0.37</b>                               |
|                                         | <b>MoS<sub>2</sub></b>  | <b>-0.39 Hz</b>                              | <b>0.18</b>                               |
|                                         |                         | <b>-0.71 Hz</b>                              | <b>0.22</b>                               |
|                                         |                         | <b>-0.4 Hz</b>                               | <b>0.17</b>                               |
| <b>NOM in Na<sup>+</sup></b>            | <b>GO</b>               | <b>-1.88 Hz</b>                              | <b>0.61</b>                               |
|                                         |                         | <b>-1.84 Hz</b>                              | <b>0.65</b>                               |
|                                         |                         | <b>-1.48 Hz</b>                              | <b>0.41</b>                               |
|                                         |                         | <b>-1.38 Hz</b>                              | <b>0.60</b>                               |
|                                         | <b>MoS<sub>2</sub></b>  | <b>-1.79 Hz</b>                              | <b>0.34</b>                               |
|                                         |                         | <b>-1.38 Hz</b>                              | <b>0.35</b>                               |
| <b>NOM in Ca<sup>2+</sup></b>           | <b>GO</b>               | <b>-6.23 Hz</b>                              | <b>0.85</b>                               |
|                                         |                         | <b>-5.92 Hz</b>                              | <b>0.75</b>                               |
|                                         |                         | <b>-5.33 Hz</b>                              | <b>0.38</b>                               |
|                                         | <b>MoS<sub>2</sub></b>  | <b>-5.41 Hz</b>                              | <b>0.35</b>                               |
|                                         |                         | <b>-4.06 Hz</b>                              | <b>0.4</b>                                |
|                                         |                         | <b>-4.646 Hz</b>                             | <b>0.43</b>                               |
| <b>NOM in Mg<sup>2+</sup></b>           | <b>GO</b>               | <b>-5.73 Hz</b>                              | <b>0.84</b>                               |
|                                         |                         | <b>-4.21 Hz</b>                              | <b>0.69</b>                               |
|                                         |                         | <b>-5.38 Hz</b>                              | <b>0.75</b>                               |
|                                         | <b>MoS<sub>2</sub></b>  | <b>-2.93 Hz</b>                              | <b>0.47</b>                               |
|                                         |                         | <b>-4.66 Hz</b>                              | <b>0.41</b>                               |
|                                         |                         | <b>-3.89 Hz</b>                              | <b>0.33</b>                               |
| <b><i>E. coli</i> in Na<sup>+</sup></b> | <b>GO</b>               | <b>-6.95 Hz</b>                              | <b>0.72</b>                               |
|                                         |                         | <b>-6.08 Hz</b>                              | <b>0.61</b>                               |
|                                         |                         | <b>-9.13 Hz</b>                              | <b>0.81</b>                               |
|                                         | <b>MoS<sub>2</sub></b>  | <b>-4.22 Hz</b>                              | <b>0.69</b>                               |
|                                         |                         | <b>-6.58 Hz</b>                              | <b>0.67</b>                               |
|                                         |                         | <b>-4.22 Hz</b>                              | <b>0.42</b>                               |

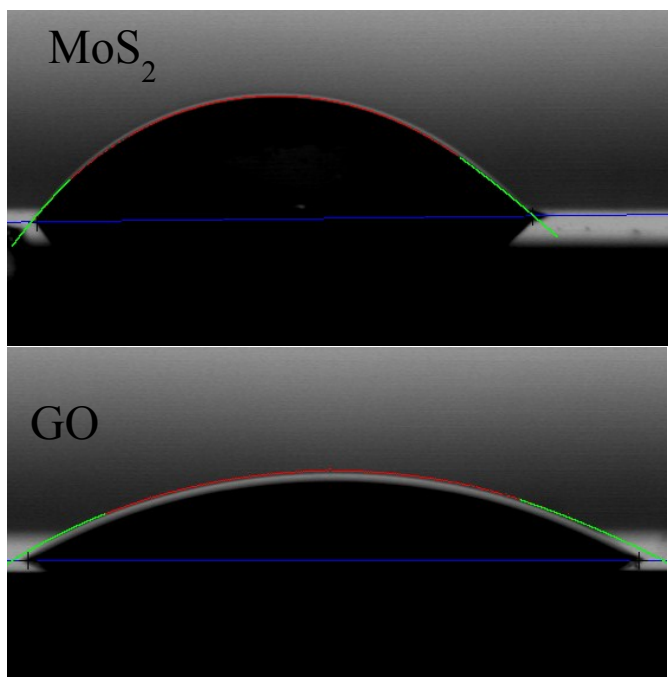

| Sample           | Contact Angle (°) |
|------------------|-------------------|
| MoS <sub>2</sub> | 42 ± 4.6          |
| GO               | 25 ± 5.4          |

**Figure S3.** Contact angle measurements of GO and MoS<sub>2</sub> on SiO<sub>2</sub> substrate.



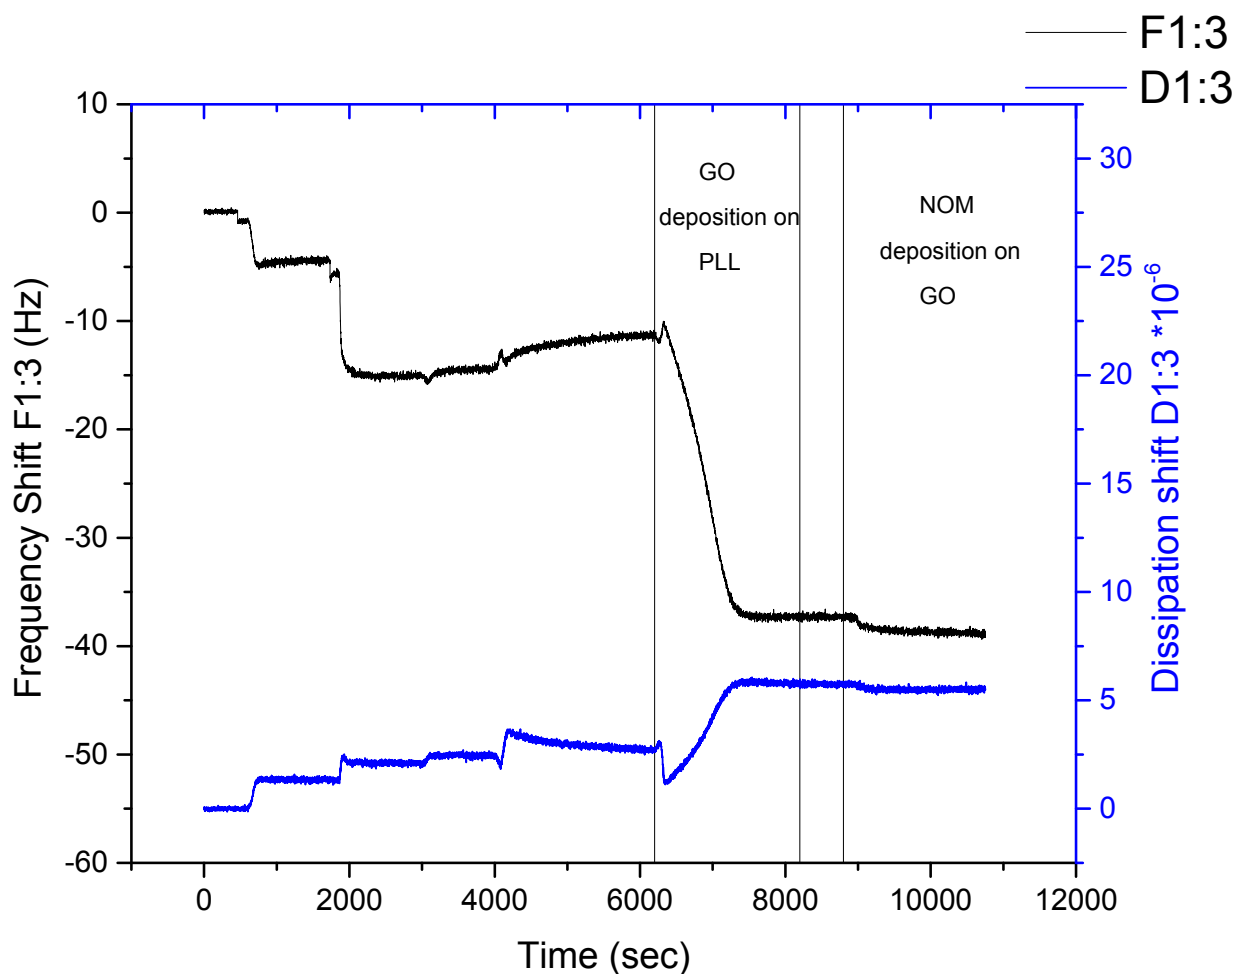

**Figure S4.** Real time data of the NOM deposition on a GO surface during different experiments acquired from QCM-D software tools Q-Tools. Small changes in frequency shift and dissipation energy indicates NOM deposition on GO surface. Here, F1:3 and D1:3 denote frequency shift and dissipation shift, respectively, on 3<sup>rd</sup> overtone during the NOM interactions with the material surface.

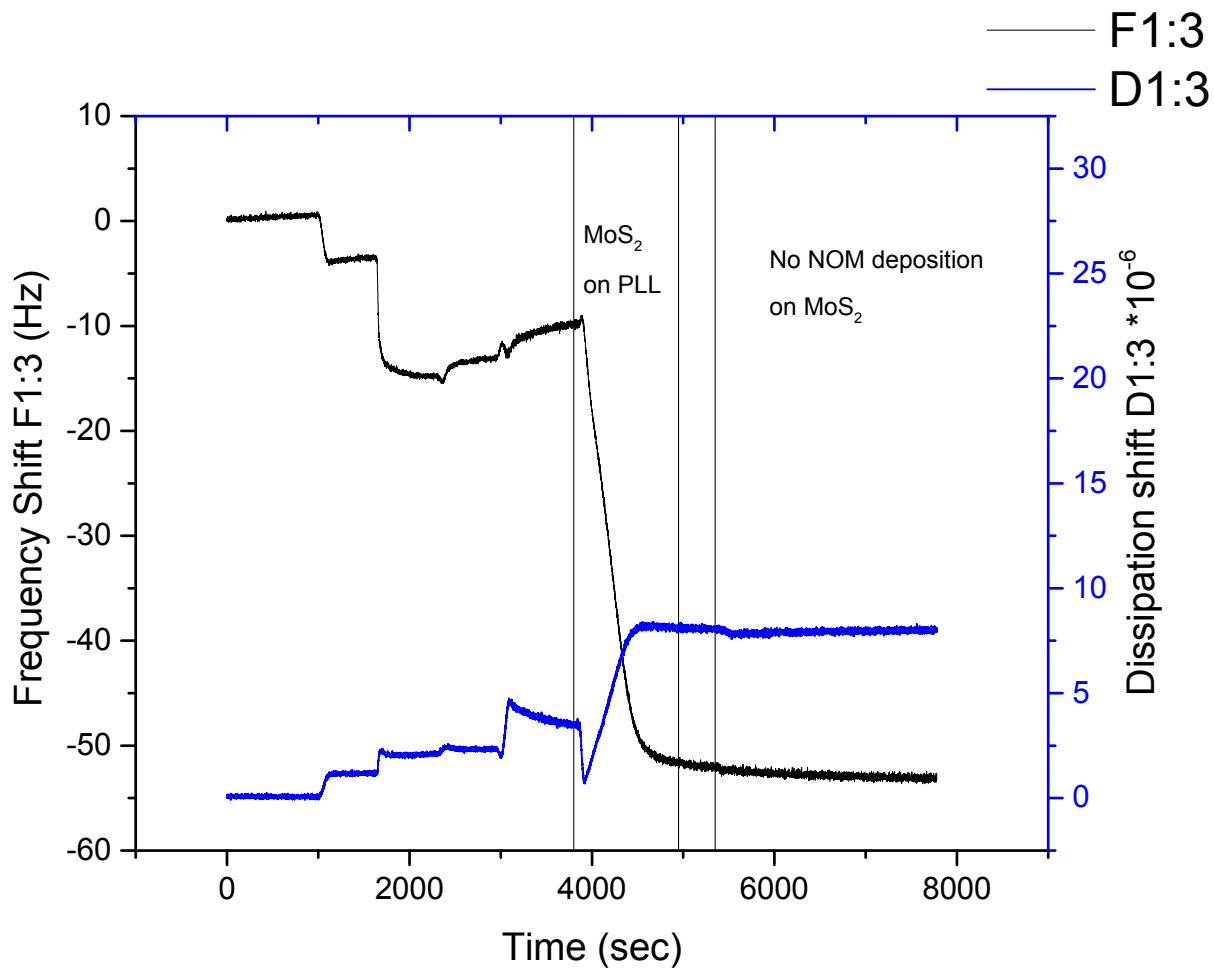

**Figure S5.** Real time data of the NOM deposition on a MoS<sub>2</sub> surface during different experiments acquired from QCM-D software tools Q-Tools. NOM showed hardly any change in frequency shift and dissipation energy during NOM deposition indicating no interaction of NOM with MoS<sub>2</sub> surface.

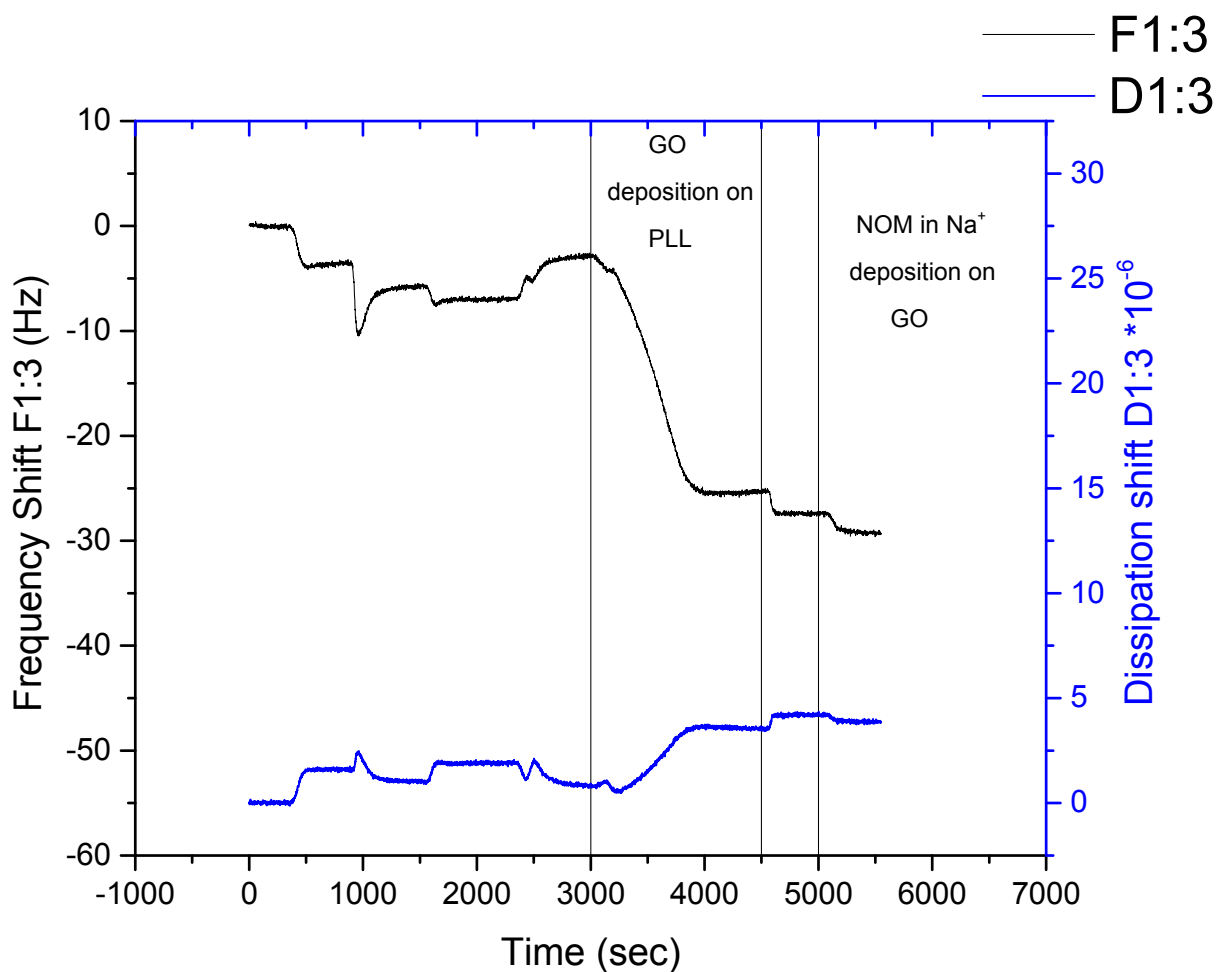

**Figure S6.** Real time data of the NOM in NaCl deposition on a GO surface during different experiments acquired from QCM-D software tools Q-Tools. NOM showed a slight change in frequency shift and dissipation energy during NOM deposition indicating interaction of NOM with the GO surface.

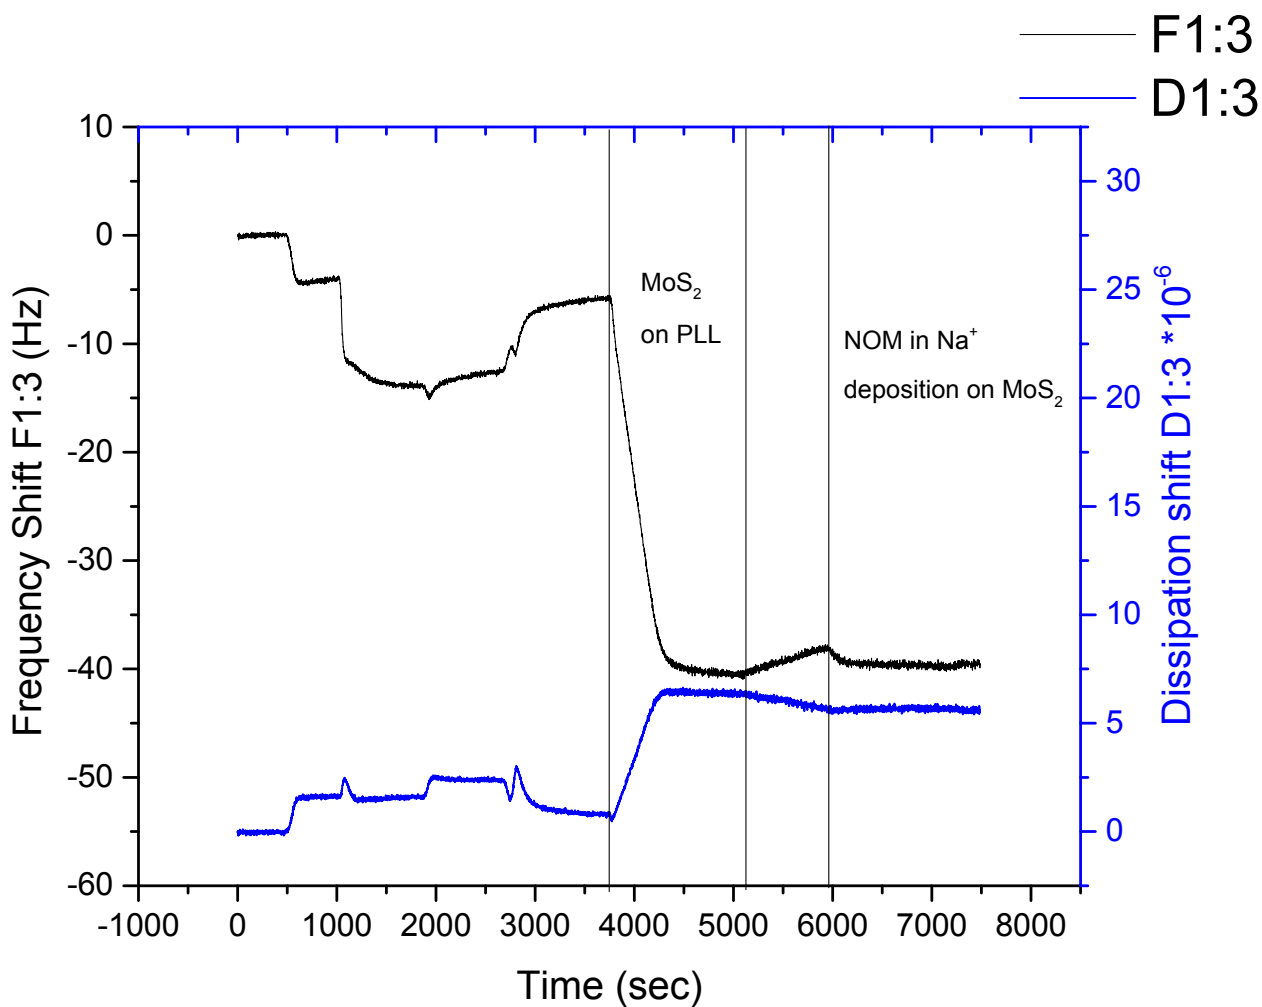

**Figure S7.** Real time data of the NOM in NaCl deposition on a MoS<sub>2</sub> surface during different experiments acquired from QCM-D software tools Q-Tools. NOM showed a slight change in frequency shift and dissipation energy during NOM deposition in the presence of the monovalent ion. Presence of NaCl in NOM increased the interaction of NOM with MoS<sub>2</sub>.

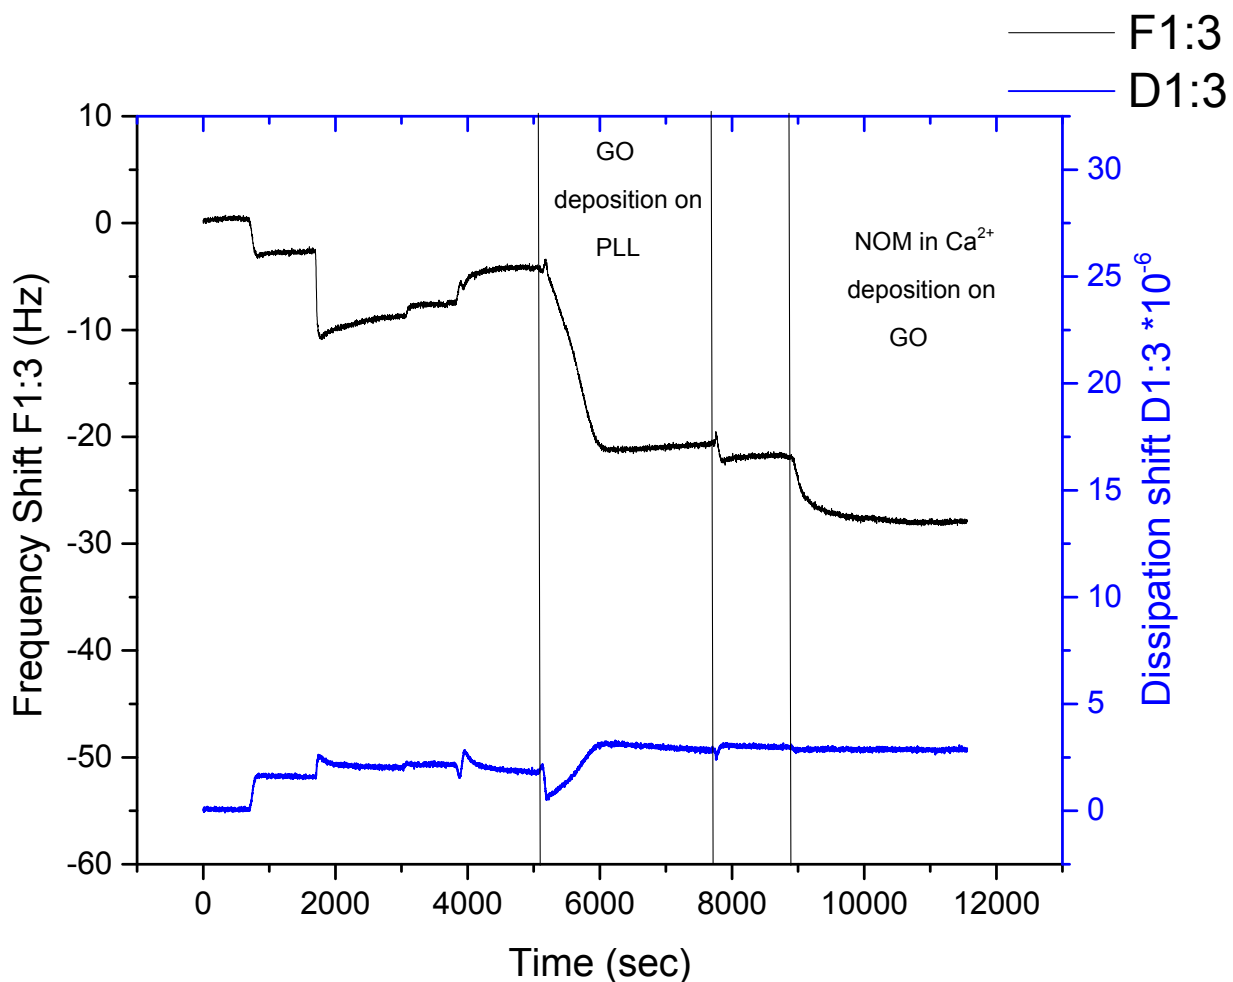

**Figure S8.** Real time data of the NOM in  $\text{CaCl}_2$  deposition on a GO surface during different experiments acquired from QCM-D software tools Q-Tools. NOM showed a huge change in frequency shift and dissipation energy compared to NOM in  $\text{NaCl}$  during NOM deposition in the presence of the divalent cation. NOM in  $\text{MgCl}_2$  showed a similar type of interaction with the GO surface.

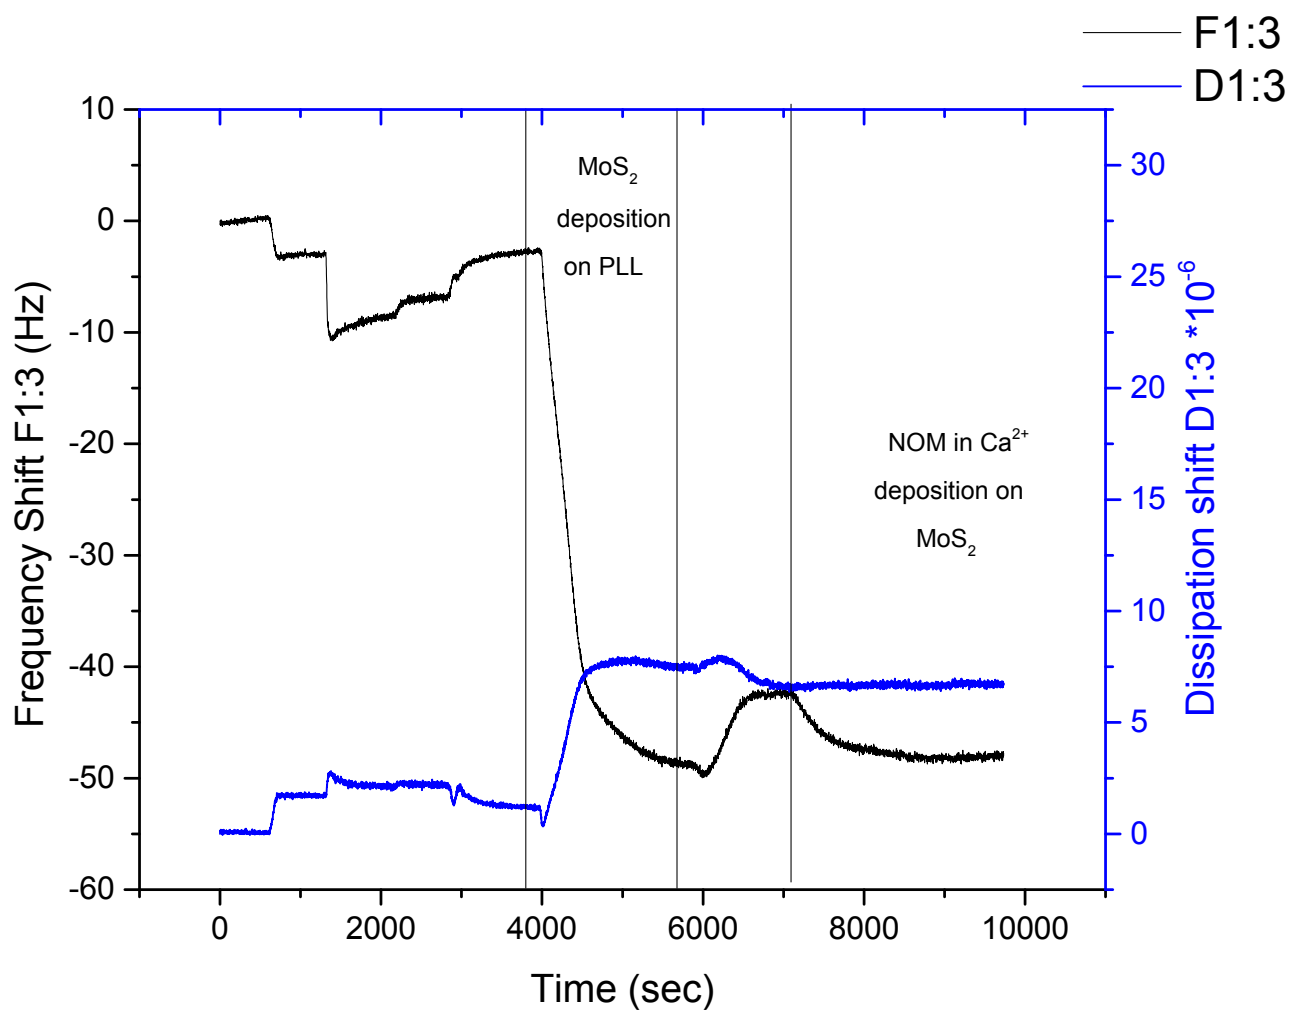

**Figure S9.** Real time data of the NOM in CaCl<sub>2</sub> deposition on a MoS<sub>2</sub> surface during different experiments acquired from QCM-D software tools Q-Tools. NOM in MgCl<sub>2</sub> showed a similar type of interaction with the MoS<sub>2</sub> surface. Similar to the GO surface, NOM in the presence of divalent cations showed higher deposition on the MoS<sub>2</sub> surface.

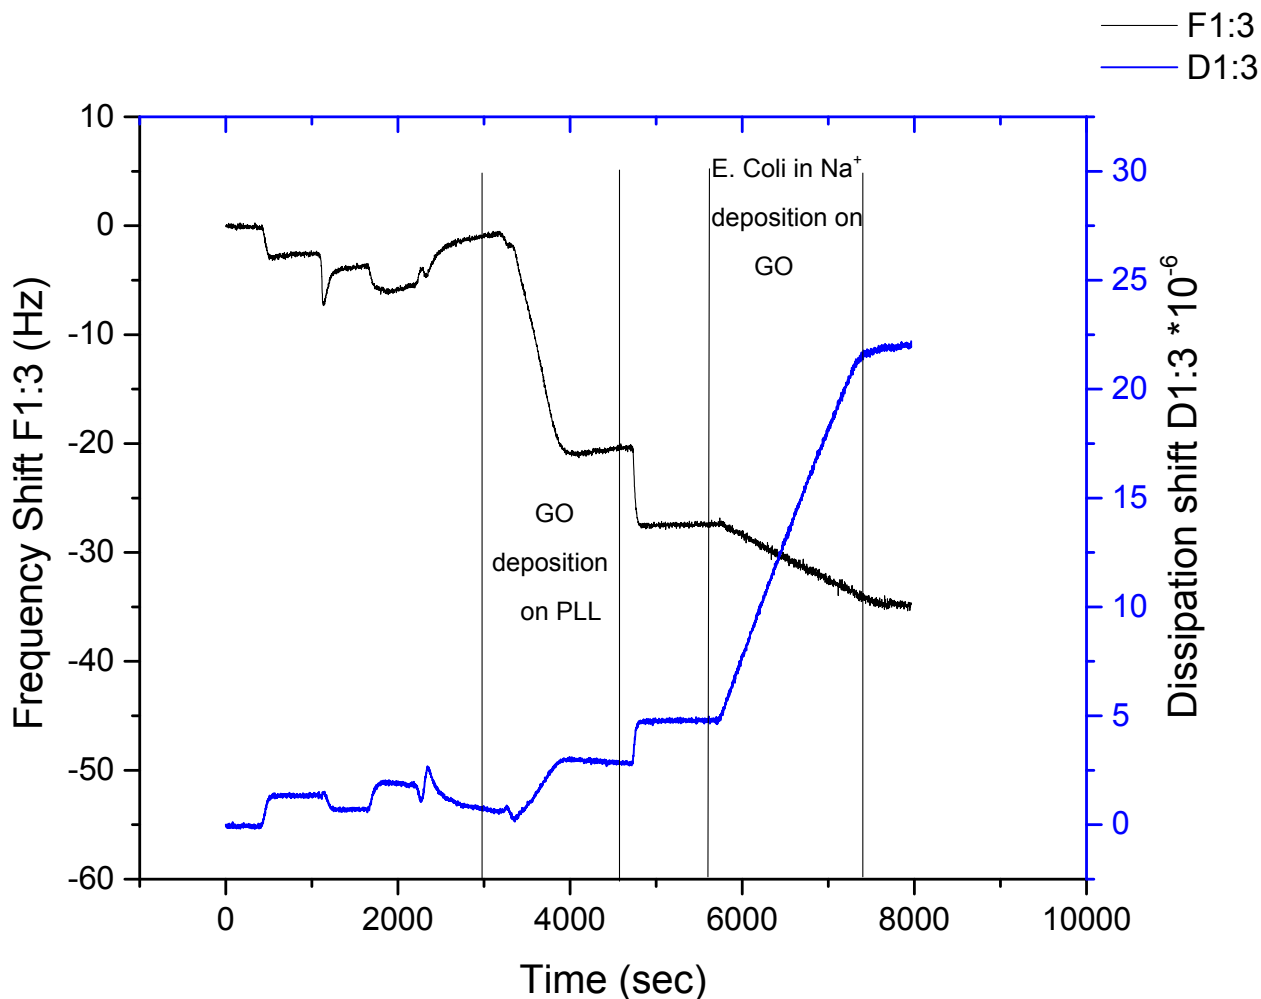

**Figure S10.** Real time data of the *E. Coli* in NaCl deposition on a GO surface during different experiments acquired from QCM-D software tools Q-Tools. *E. coli* deposited slowly but continuously for 30 min (change in frequency shift and dissipation energy) until the *E. Coli* injection was stopped and background salt solution was flowed (indicated by stabilization of frequency shift and dissipation energy). Unlike NOM, *E. Coli* showed a huge change in dissipation energy which indicates a softer layer is created by *E. Coli*.

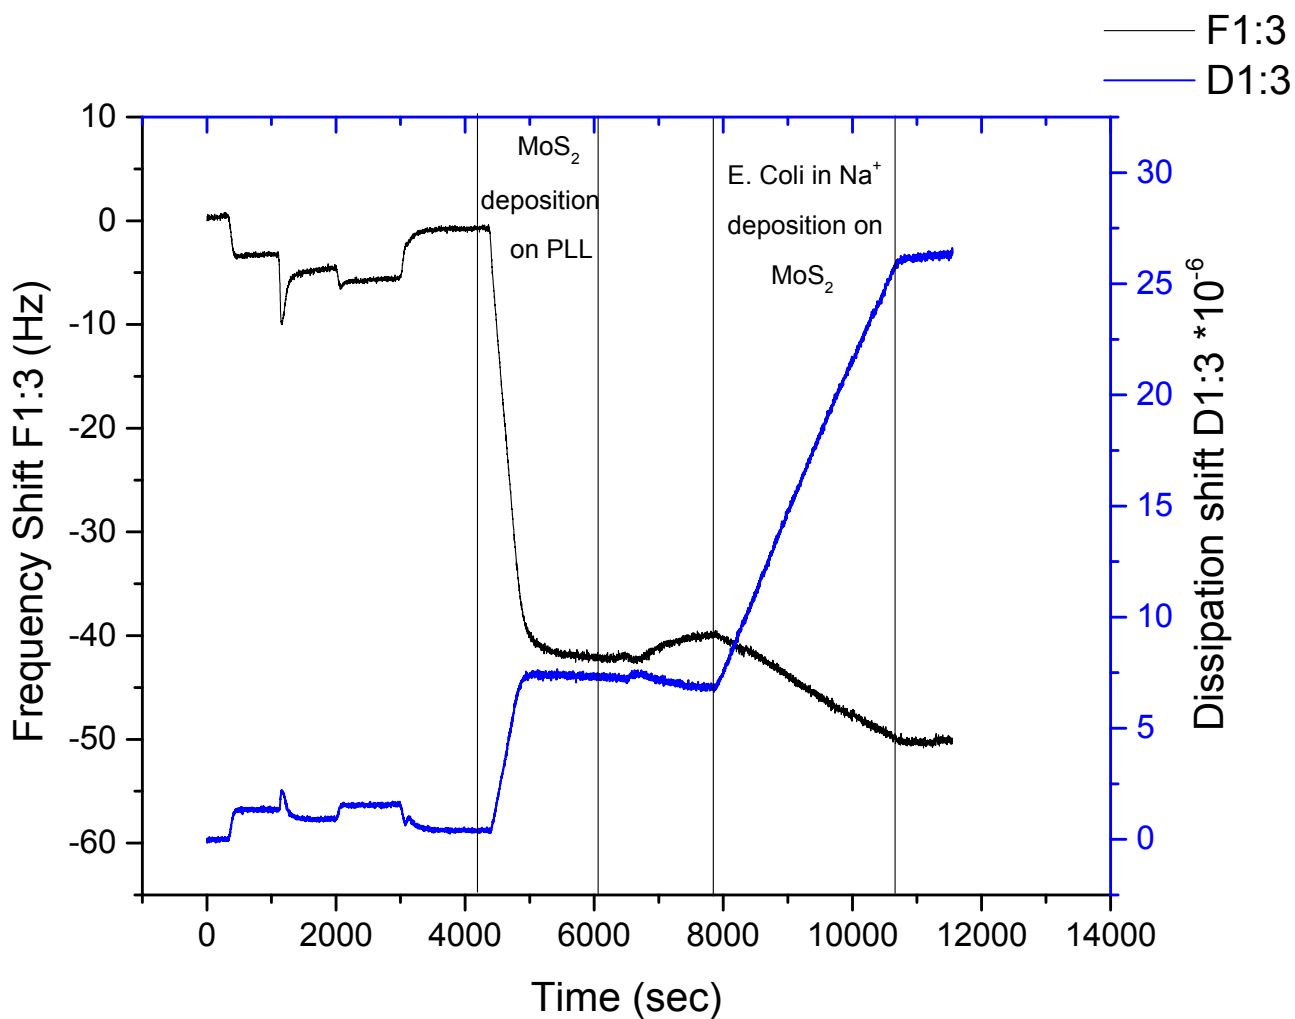

**Figure S11.** Real time data of the *E. coli* in NaCl deposition on a MoS<sub>2</sub> surface during different experiments acquired from QCM-D software tool Q-Tools. Here also, *E. coli* deposited slowly but continuously for 30 min until the *E. coli* injection was stopped and background salt solution was flowed.



## Interaction Energy Profiles for NOM/*E.Coli* in Na<sup>+</sup> and GO/MoS<sub>2</sub>

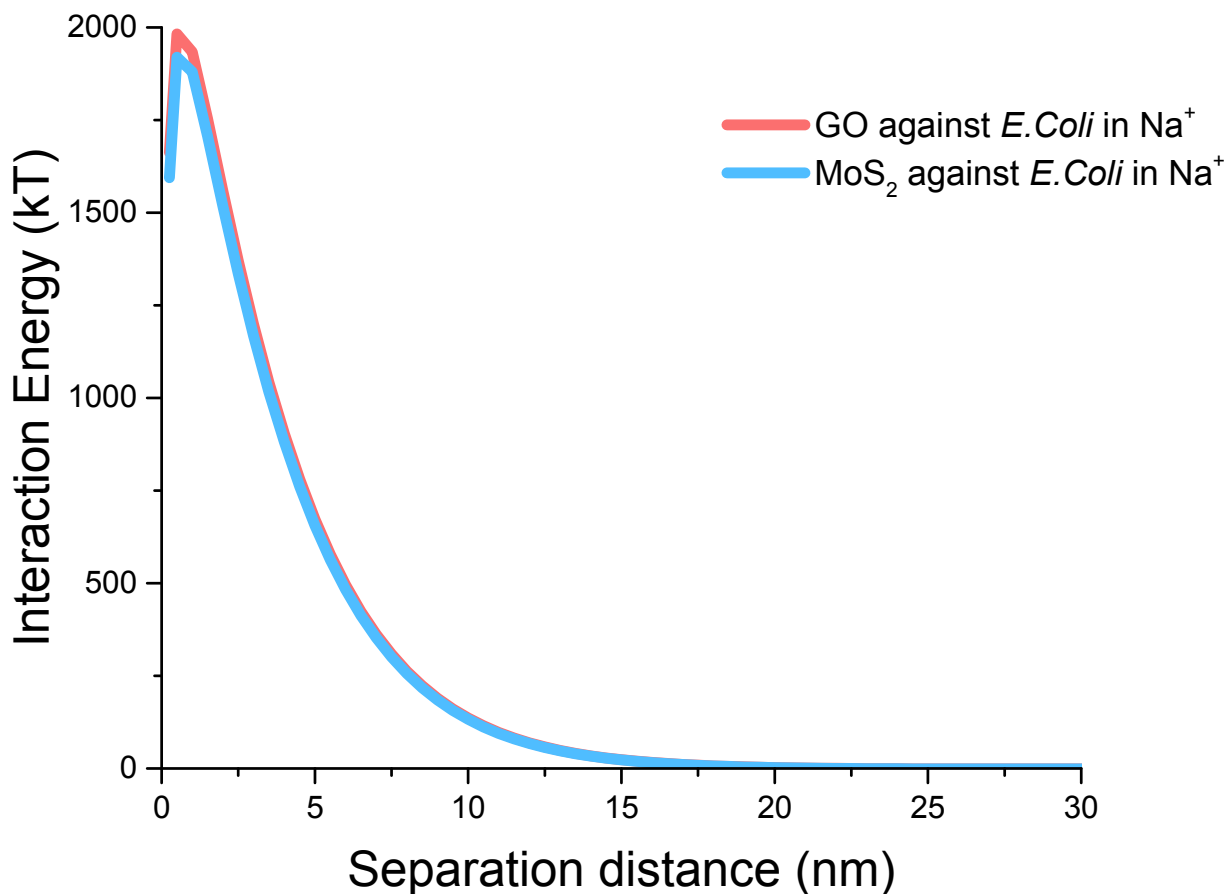

**Figure S12.** A high energy barrier (2000 KT) exists in the case of *E. coli* deposition in NaCl on GO and MoS<sub>2</sub> surfaces which supports the experimental observation of low deposition and attachment efficiency of *E. coli* to the material surfaces. This interaction energy is much higher than the average thermal energy of the particles (1.5 kT).

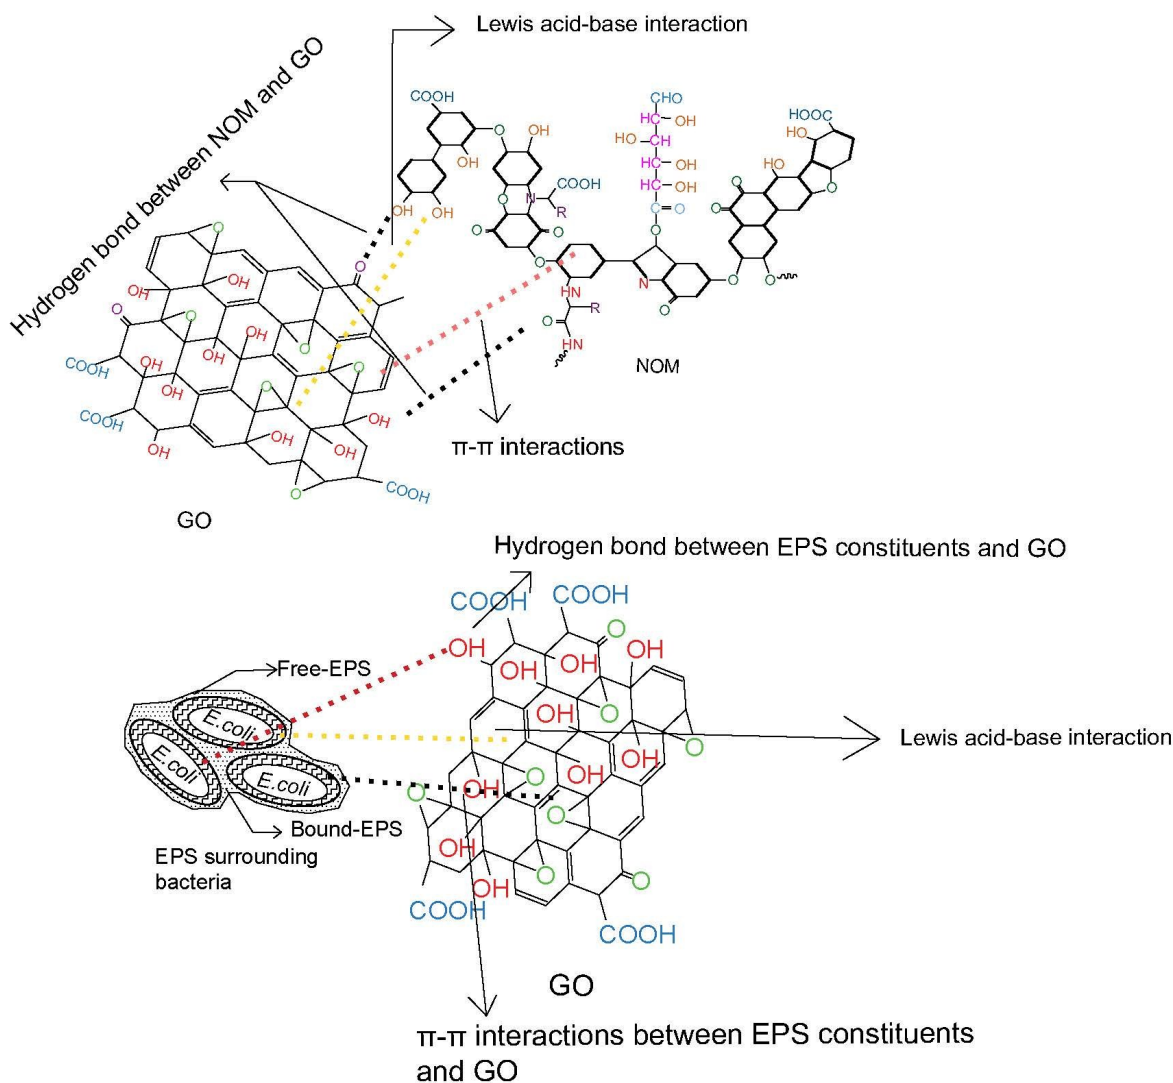

**Figure S13.** Mechanisms of interactions of GO with NOM and *E. coli*. Hydrogen bond between functional groups of NOM and EPS constituents,  $\pi$ - $\pi$  interaction between aromatic rings of foulants and GO, Lewis acid-base interaction between GO center (Lewis acid) and -OH (Lewis base) functional groups of foulants etc. play significant role in foulant deposition on GO surface.

## References.

1. M. C. Duch, G. R. S. Budinger, Y. T. Liang, S. Soberanes, D. Urich, S. E. Chiarella, L. A. Campochiaro, A. Gonzalez, N. S. Chandel, M. C. Hersam and G. M. Mutlu, Minimizing Oxidation and Stable Nanoscale Dispersion Improves the Biocompatibility of Graphene in the Lung, *Nano Letters*, 2011, **11**, 5201-5207.
2. I. Chowdhury, M. C. Duch, N. D. Mansukhani, M. C. Hersam and D. Bouchard, Colloidal Properties and Stability of Graphene Oxide Nanomaterials in the Aquatic Environment, *Environmental Science & Technology*, 2013, **47**, 6288-6296.
3. I. Chowdhury, M. C. Duch, N. D. Mansukhani, M. C. Hersam and D. Bouchard, Interactions of Graphene Oxide Nanomaterials with Natural Organic Matter and Metal Oxide Surfaces, *Environmental Science & Technology*, 2014, **48**, 9382-9390.
4. J. Gregory, *Particles in Water: Properties and Processes*, CRC Press, 2005.
5. R. Hogg, T. W. Healy and D. W. Fuerstenau, Mutual coagulation of colloidal dispersions, *Transactions of the Faraday Society*, 1966, **62**, 1638-1651.
